# Supplementary material for: Chemoselective reduction of quinoline over Rh–C60 nanocatalysts
Source: Royal Society of Chemistry journal article supplement (doi:10.1039/c9cy02025j), 2019-01-01
Supplement: c9cy02025j1.pdf [file c9cy02025j1.pdf]

## Supporting information

### Chemoselective reduction of quinoline over Rh-C<sub>60</sub> nanocatalysts

Zhishan Luo,<sup>a</sup> Yuanyuan Min,<sup>a</sup> Divya Nechiyl,<sup>b</sup> Wolfgang Bacsa,<sup>b</sup> Yann Tison,<sup>c</sup> Hervé Martinez,<sup>c</sup> Pierre Lecante,<sup>b</sup> Iann C. Gerber,<sup>d</sup> Philippe Serp,<sup>a</sup> and M. Rosa Axet<sup>a\*</sup>

<sup>a</sup> LCC-CNRS, Université de Toulouse, CNRS, INPT, Toulouse, France

<sup>b</sup> Centre d'élaboration des matériaux et d'études structurales UPR CNRS 8011, 29 Rue Jeanne-Marvig, BP 4347, 31055 Toulouse, France

<sup>c</sup> CNRS/UNIV PAU & PAYS ADOUR/E2S UPPA, Institut des sciences analytiques et de physicochimie pour l'environnement et les matériaux, UMR5254, 64000, Pau, France.

<sup>d</sup> LPCNO, Université de Toulouse, INSA-CNRS-UPS, 135 Avenue de Rangueil, 31077 Toulouse, France

rosa.axet@lcc-toulouse.fr

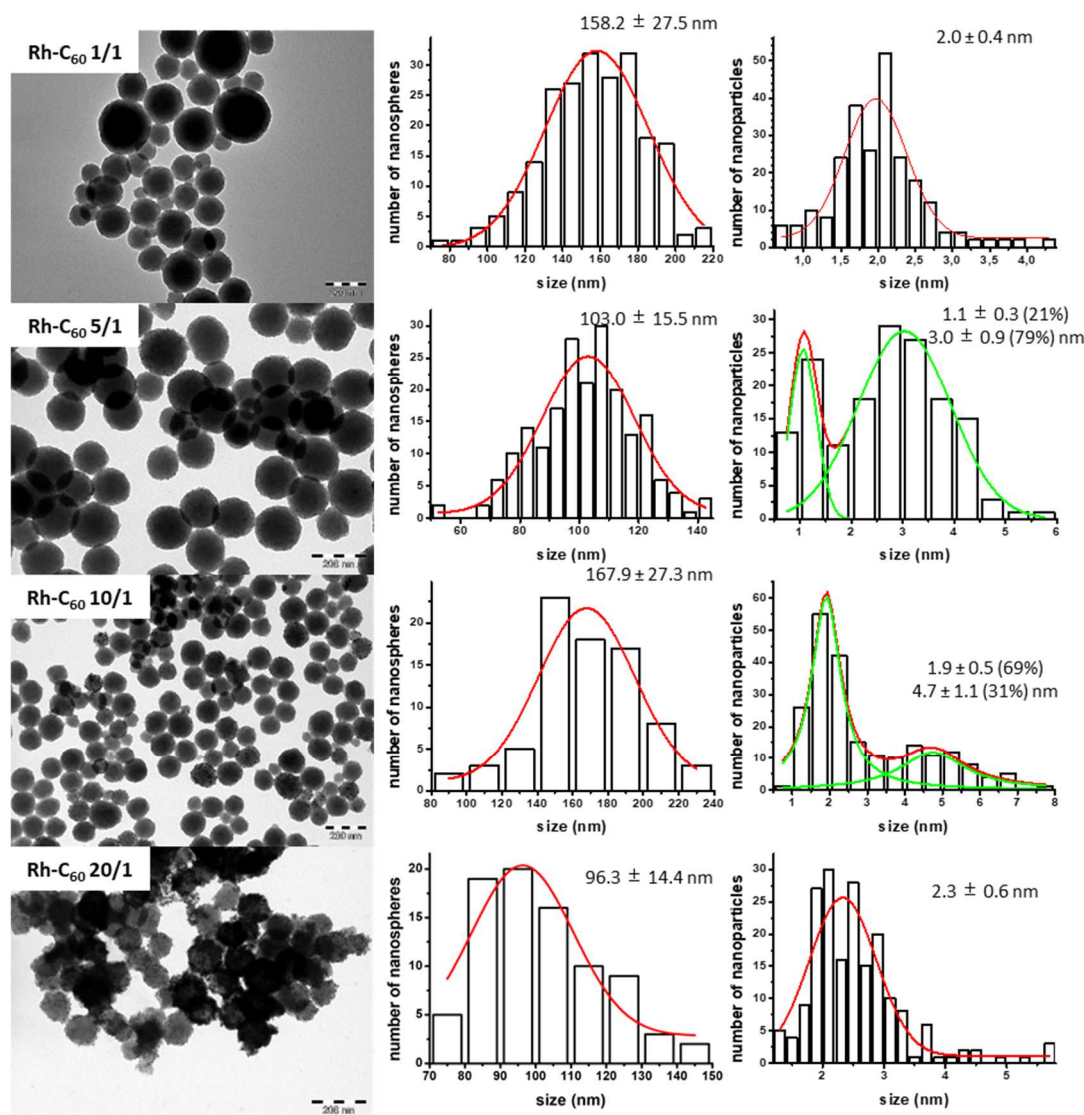

Figure S1. TEM images and size distribution histograms of Rh-C<sub>60</sub> 1/1, 5/1, 10/1 and 20/1 (scale bar 200 nm).

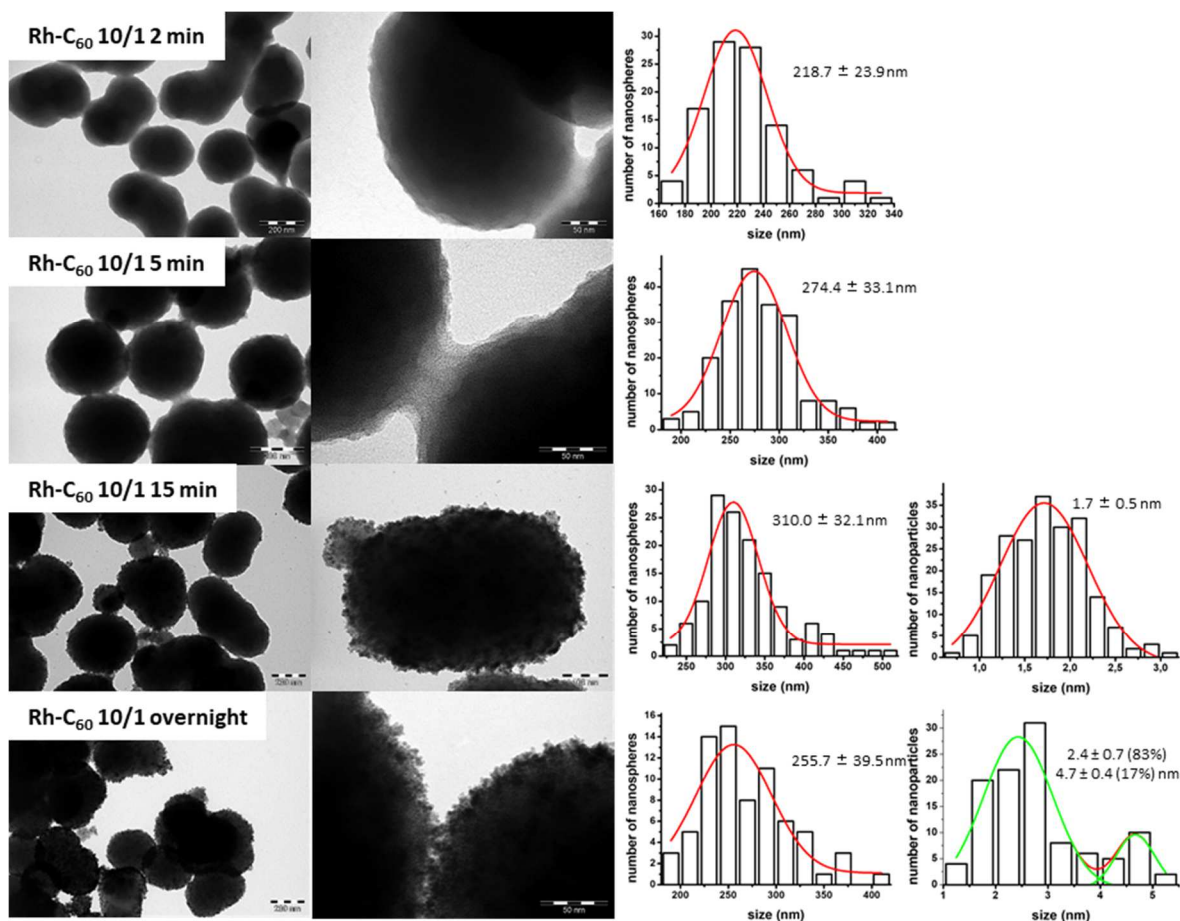

**Figure S2.** TEM images and size distribution histograms of Rh-C<sub>60</sub> 10/1 synthesized in dichlorobenzene at -20°C (scale bar from left to right: 2 min, 200 and 50 nm; 5 min, 200 and 50 nm; 15 min, 200 and 50 nm; and overnight, 200 and 50 nm).

**Table S1.** Mean size distributions of Rh-C<sub>60</sub> nanocatalysts synthesised at -20°C.

| Time      | NP mean size (nm) <sup>a</sup>                                                    | Nanospheres mean size (nm) <sup>a</sup> |
|-----------|-----------------------------------------------------------------------------------|-----------------------------------------|
| 2 min     | -                                                                                 | 218.7 ± 23.9                            |
| 5 min     | -                                                                                 | 274.4 ± 33.1                            |
| 15 min    | 1.7 ± 0.5 NP on the nanospheres surface<br>3.4 ± 1.3 NP dispersed on the TEM grid | 310.0 ± 32.1                            |
| overnight | 2.4 ± 0.7 (83%) / 4.7 ± 0.4 (17%) <sup>b</sup>                                    | 255.7 ± 39.5                            |

<sup>a</sup> Manual measurement from enlarged TEM micrographs. <sup>b</sup> In brackets percentage of each population

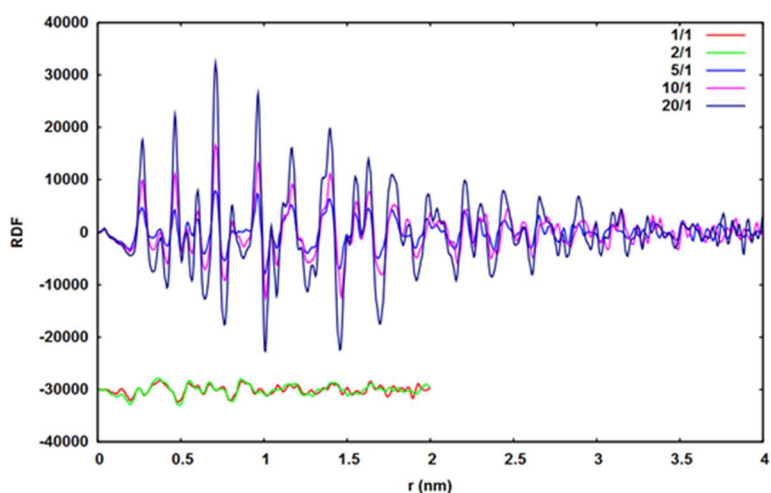

Figure S3. Related PDF for Rh-C<sub>60</sub> compounds.

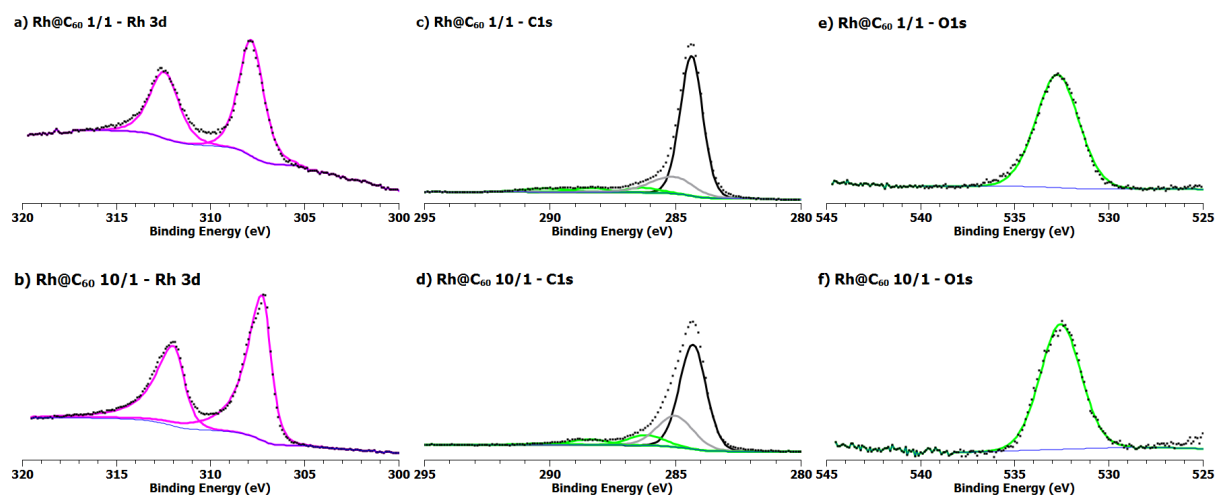

Figure S4. XPS analyses and peak fitting of Rh-C<sub>60</sub> compounds, top 1/1, bottom 1/10.

Table S2. XPS data (peak fitting, FWHM and atomic concentration) for Rh-C<sub>60</sub> samples.

| Core peak | Component       | Rh@C <sub>60</sub> 1/1 |           |      | Rh@C <sub>60</sub> 10/1 |           |      |
|-----------|-----------------|------------------------|-----------|------|-------------------------|-----------|------|
|           |                 | BE (eV)                | FWHM (eV) | At % | BE (eV)                 | FWHM (eV) | At % |
| Rh 3d     | Rh metal        | 307.8-312.4            | 1.6-1.8   | 1.5  | 307.2-311.9             | 1.1-1.4   | 8.0  |
|           | C <sub>60</sub> | 284.3                  | 1.1       | 68.7 | 284.3                   | 1.2       | 52.5 |
|           | C-C, C-H        | 285.0                  | 1.8       | 16.1 | 285.0                   | 1.7       | 21.2 |
| C 1s      | Oxygenated      | 286.3                  | 1.6       | 3.6  | 286.2                   | 1.7       | 6.0  |
|           | Carbon          | 288.4                  | 1.6       | 2.2  | 288.4                   | 1.7       | 2.8  |
|           | Shake-up        | 290.2                  | 2.2       | 3.4  | 290.0                   | 2.0       | 1.2  |
| O 1s      | O bound to C    | 532.7                  | 2.7       | 4.5  | 532.6                   | 2.5       | 8.3  |

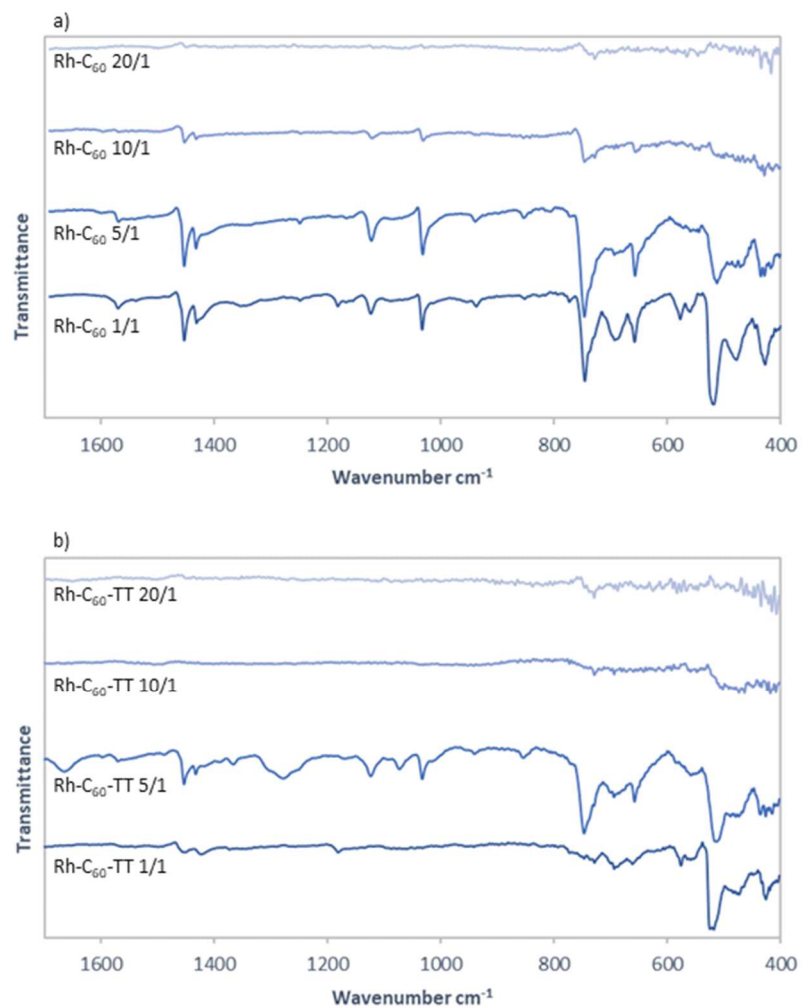

**Figure S5.** ATR-IR spectra of a) Rh-C<sub>60</sub> and b) Rh-C<sub>60</sub> after thermal treatment.

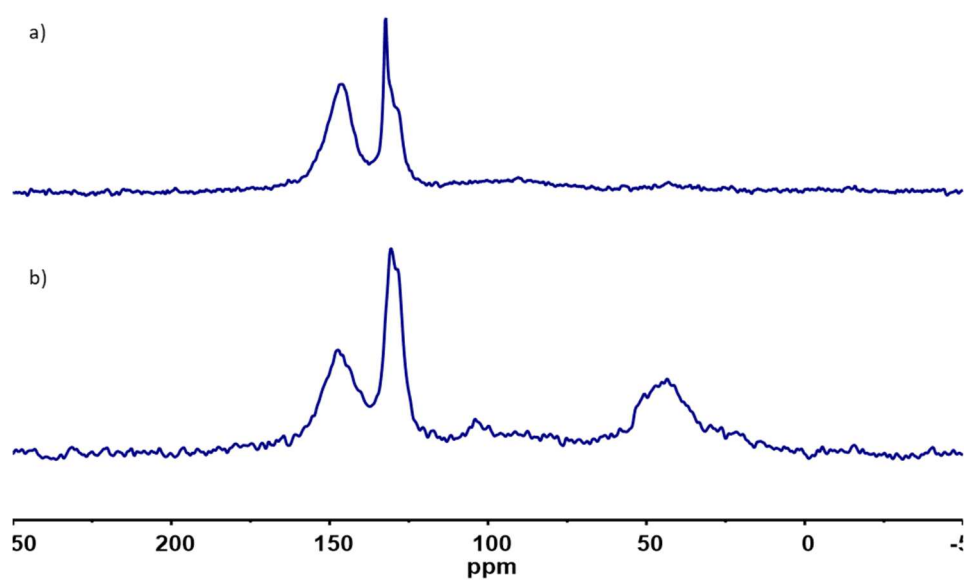

**Figure S6.** a) <sup>13</sup>C{<sup>1</sup>H} and b) CP-MAS <sup>13</sup>C{<sup>1</sup>H} NMR of Rh-C<sub>60</sub> 10/1.

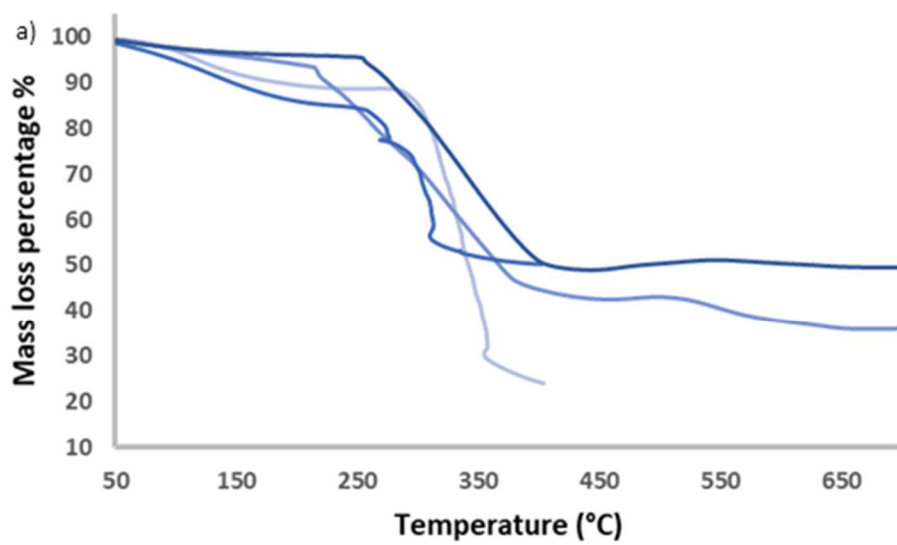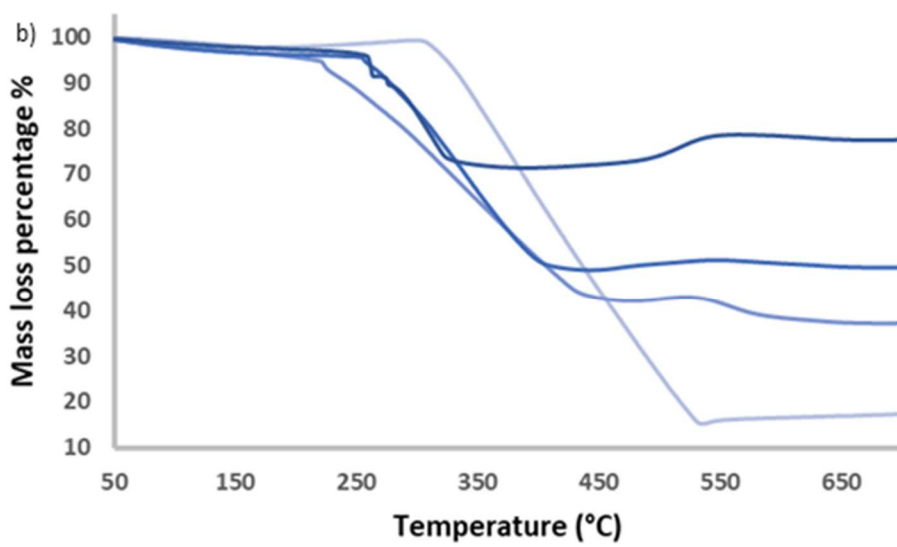

Figure S7. Thermogravimetric analyses of a) Rh-C<sub>60</sub> and b) Rh-C<sub>60</sub> after thermal treatment.

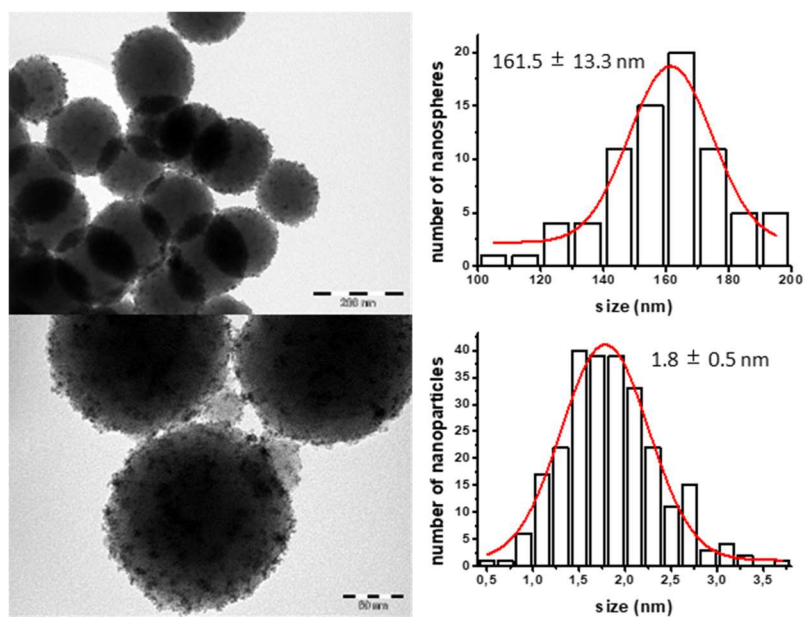

**Figure S8.** TEM images of Rh-C<sub>60</sub> 5/1 after thermal treatment under argon at 200°C (scale bar top: 200 nm; bottom 50 nm).

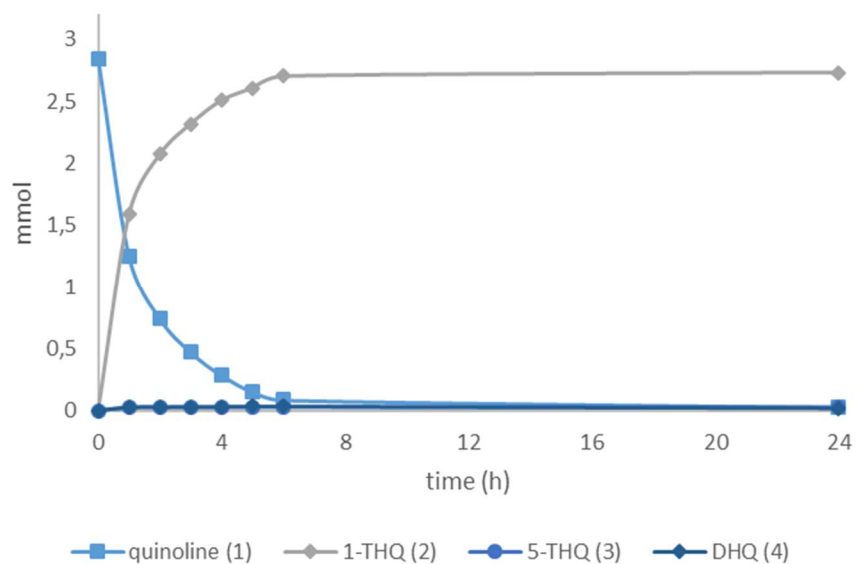

**Figure S9.** Time-concentration curve for quinoline hydrogenation using Rh-C<sub>60</sub> 10/1 in toluene.

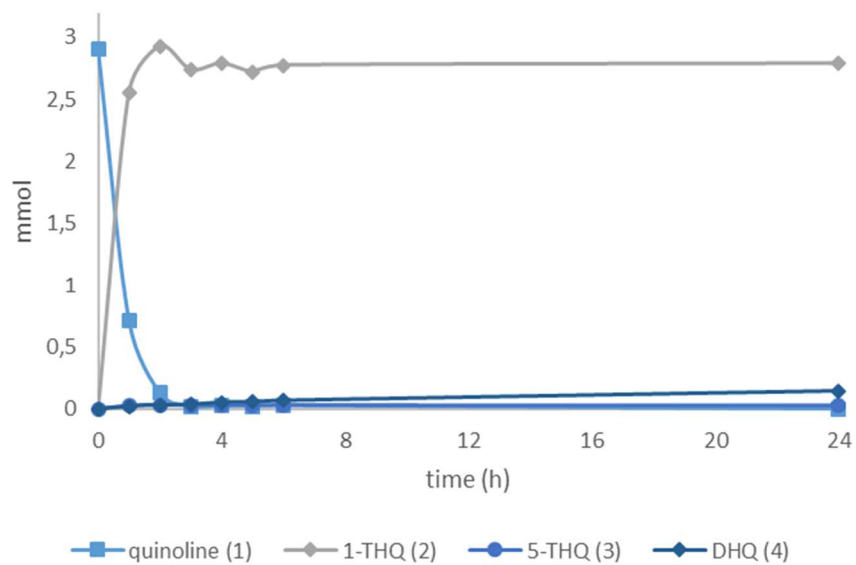

**Figure S10.** Time-concentration curve for quinoline hydrogenation using Rh-C<sub>60</sub> 10/1 in isopropanol.

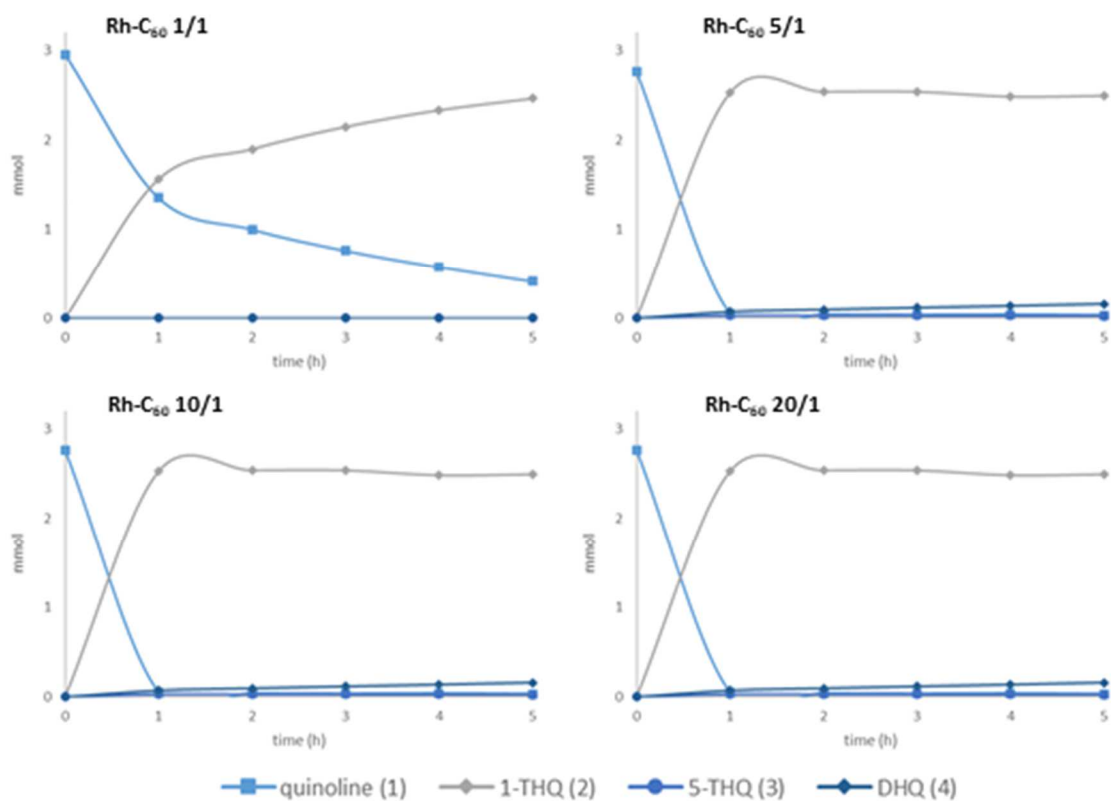

**Figure S11.** Time-concentration curve for quinoline hydrogenation using Rh-C<sub>60</sub> series in isopropanol at 100°C under 20 bar of H<sub>2</sub>.

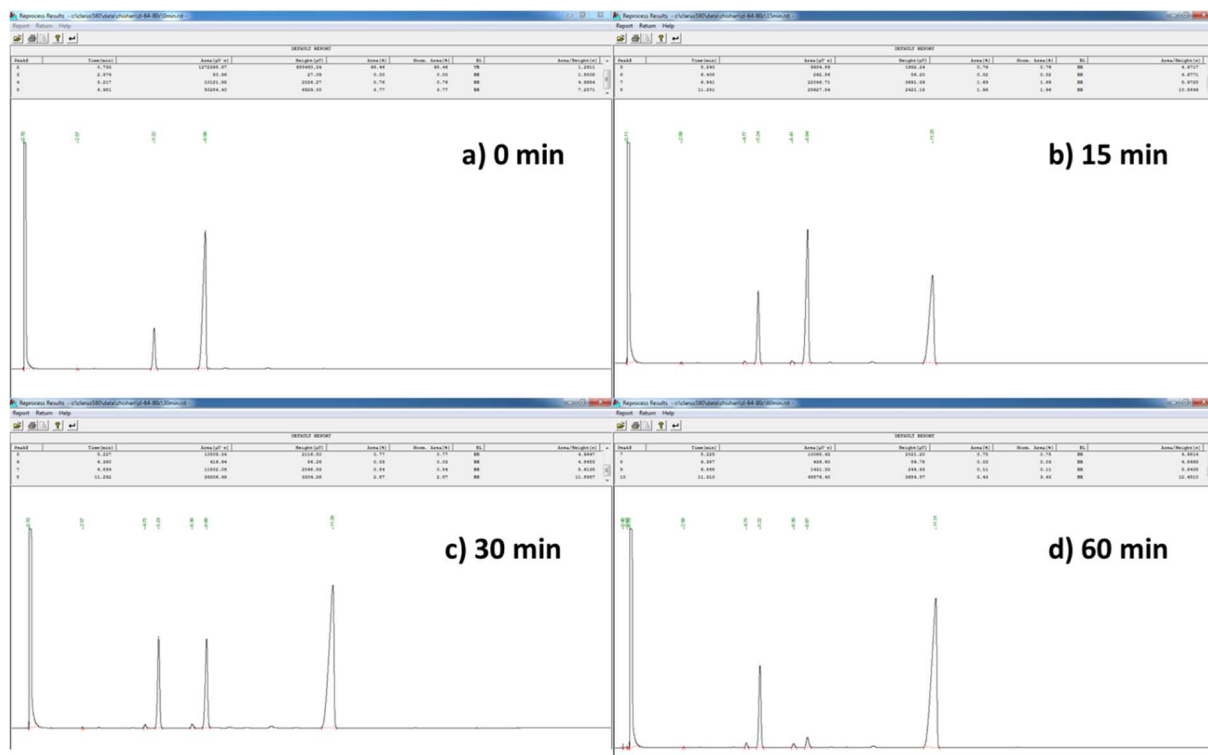

Figure S12. Chromatograms of quinoline hydrogenation using Rh-C<sub>60</sub> 5/1 TT in isopropanol at 80°C under 20 bar of H<sub>2</sub>.

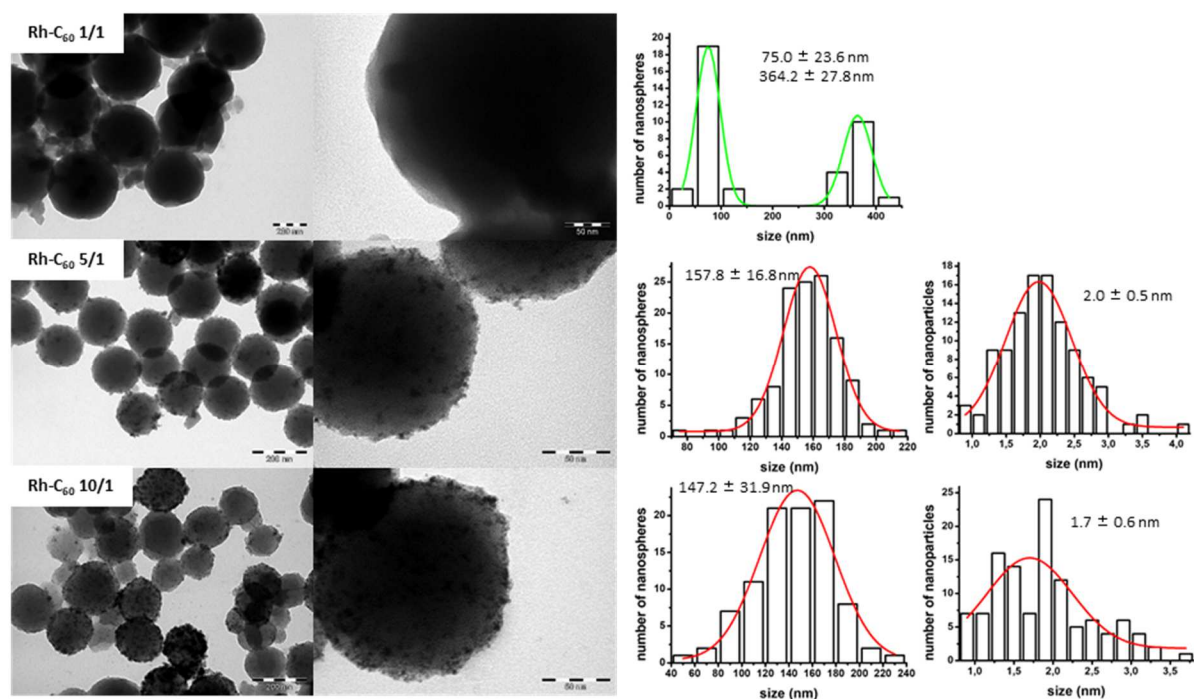

Figure S13. TEM images and size distribution histograms of Rh-C<sub>60</sub> nanostructures after catalysis (scale bar from left to right: 200 nm and 50 nm).



**Table S3.** Comparison of the TOFs values and selectivities in quinoline hydrogenation of several representative heterogeneous catalysts with Rh-C<sub>60</sub>.

| Catalyst                                                             | T<br>(°C) | P<br>(MPa) | t<br>(h) | Select.<br>(%) | TOF<br>(h <sup>-1</sup> ) |
|----------------------------------------------------------------------|-----------|------------|----------|----------------|---------------------------|
| Rh-C <sub>60</sub>                                                   | 100       | 2          | 0.25     | >99            | 488.0                     |
| Rh/[bmim]Cl-ZnCl <sub>2</sub> -[bmim][BF <sub>4</sub> ] <sup>1</sup> | 80        | 3          | 15       | 90             | 6.3                       |
| NHC-stabilized Rh <sup>2</sup>                                       | 30        | 3          | 2.5      | 75             | 238                       |
| PEG <sub>4000</sub> -stabilized Rh <sup>3</sup>                      | 100       | 3          | 3        | >99            | 762                       |
| Au/HAS-TiO <sub>2</sub> <sup>4</sup>                                 | 60        | 2          | 3.5      | 100            | 28.6                      |
| Ru-SiO <sub>2</sub> -mSiO <sub>2</sub> <sup>5</sup>                  | 90        | 2          | 5        | 100            | 29.9                      |
| Ru/[BMMIM][NTf <sub>2</sub> ] <sup>6</sup>                           | 80        | 1          | 5        | 90             | 9                         |
| Pd-polymer <sup>7</sup>                                              | 80        | 1          | 9        | 98             | 21.7                      |
| Pt/SiO <sub>2</sub> -RF <sup>8</sup>                                 | RT        | 1          | 1.5      | >99            | 16                        |
| BWT-stabilized Pd <sup>9</sup>                                       | 80        | 2          | 0.5      | 96             | 192                       |

## REFERENCES

- (1) Karakulina, A.; Gopakumar, A.; Akçok, İ.; Roulier, B. L.; LaGrange, T.; Katsyuba, S. A.; Das, S.; Dyson, P. J.: A rhodium nanoparticle–Lewis acidic ionic liquid catalyst for the chemoselective reduction of heteroarenes. *Angew. Chem., Int. Ed.* **2016**, *128*, 300-304.
- (2) Martinez-Espinar, F.; Blondeau, P.; Nolis, P.; Chaudret, B.; Claver, C.; Castellón, S.; Godard, C.: NHC-stabilised Rh nanoparticles: Surface study and application in the catalytic hydrogenation of aromatic substrates. *J. Catal.* **2017**, *354*, 113-127.
- (3) Niu, M.; Wang, Y.; Chen, P.; Du, D.; Jiang, J.; Jin, Z.: Highly efficient and recyclable rhodium nanoparticle catalysts for hydrogenation of quinoline and its derivatives. *Catal. Sci. Technol.* **2015**, *5*, 4746-4749.
- (4) Ren, D.; He, L.; Yu, L.; Ding, R.-S.; Liu, Y.-M.; Cao, Y.; He, H.-Y.; Fan, K.-N.: An unusual chemoselective hydrogenation of quinoline compounds using supported gold catalysts. *J. Am. Chem. Soc.* **2012**, *134*, 17592-17598.
- (5) Zhang, L.; Wang, X.; Xue, Y.; Zeng, X.; Chen, H.; Li, R.; Wang, S.: Cooperation between the surface hydroxyl groups of Ru–SiO<sub>2</sub>@ mSiO<sub>2</sub> and water for good catalytic performance for hydrogenation of quinoline. *Catal. Sci. Technol.* **2014**, *4*, 1939-1948.
- (6) Konnerth, H.; Precht, M. H. G.: Selective hydrogenation of N-heterocyclic compounds using Ru nanocatalysts in ionic liquids. *Green Chem.* **2017**, *19*, 2762-2767.
- (7) Dell'Anna, M. M.; Capodiferro, V. F.; Mali, M.; Manno, D.; Cotugno, P.; Monopoli, A.; Mastrorilli, P.: Highly selective hydrogenation of quinolines promoted by recyclable polymer supported palladium nanoparticles under mild conditions in aqueous medium. *Appl. Catal., A.* **2014**, *481*, 89-95.
- (8) Bai, L.; Wang, X.; Chen, Q.; Ye, Y.; Zheng, H.; Guo, J.; Yin, Y.; Gao, C.: Explaining the size dependence in platinum-nanoparticle-catalyzed hydrogenation reactions. *Angew. Chem., Int. Ed.* **2016**, *55*, 15656-15661.
- (9) Mao, H.; Ma, J.; Liao, Y.; Zhao, S.; Liao, X.: Using plant tannin as natural amphiphilic stabilizer to construct an aqueous-organic biphasic system for highly active and selective hydrogenation of quinoline. *Catal. Sci. Technol.* **2013**, *3*, 1612-1617.
